# Supplementary material
Source: PubMed Central journal article supplement (PMC3229131)
Supplement: gmb-34-1-719-gfigsuppl1.pdf [file gmb-34-1-719-gfigsuppl1.pdf]

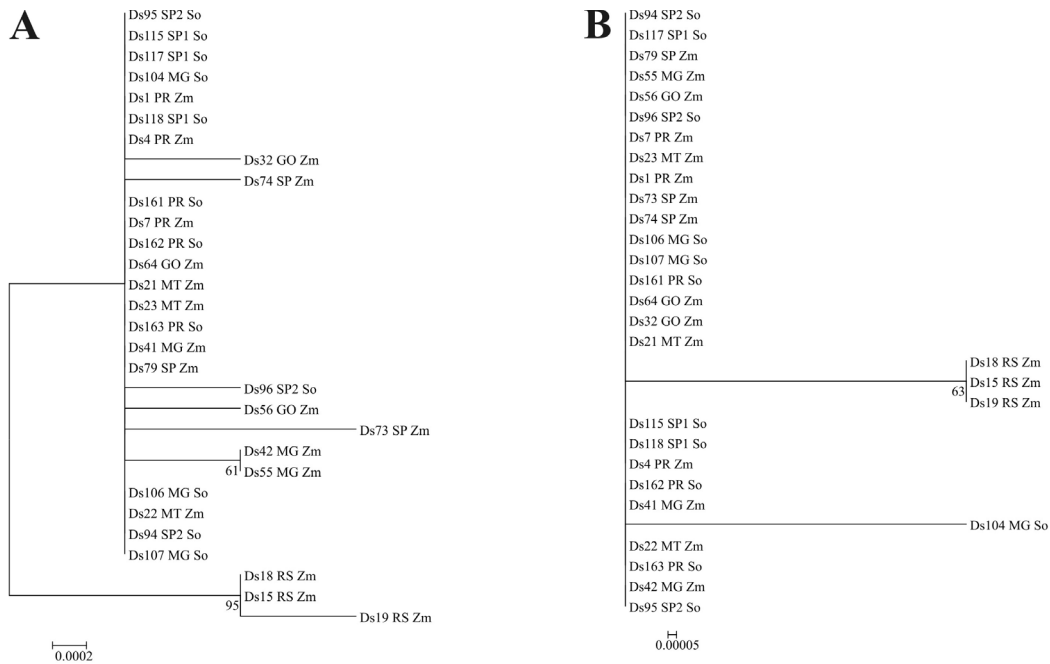

**Figure S1** - Neighbor-Joining phenetic relationships among specimens of *D. saccharalis* based on *p*-distance model of nucleotide substitution of *A. cox1* and *B. nad6* sequences. Numbers above branches are bootstraps values of 1,000 replicates (when values are higher than 50%). (Ds = *D. saccharalis*; SP = São Paulo, MG = Minas Gerais, PR = Paraná, MT = Mato Grosso, RS = Rio Grande do Sul; Zm = corn, So = sugarcane).
