# Supplementary material
Source: PubMed Central journal article supplement (PMC3229131)
Supplement: gmb-34-1-719-gfigsuppl2.pdf [file gmb-34-1-719-gfigsuppl2.pdf]

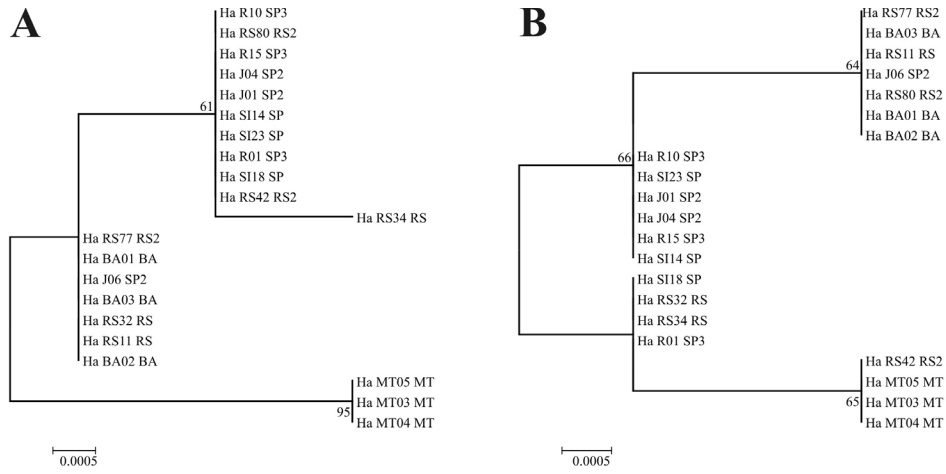

**Figure S2** - Neighbor-Joining phenetic relationships among specimens of *H. atalanta*, based in *p*-distance model of nucleotide substitution. **A.** *cox1* and **B.** *nad6*. Numbers above branches are bootstraps values of 1000 replicates (when values are higher than 50%). (Ha = *H. atalanta*; SP = São Paulo, BA = Bahia, MT = Mato Grosso, RS = Rio Grande do Sul).
